# Supplementary material for: A high-performance self-powered broadband photodetector based on a CH3NH3PbI3 perovskite/ZnO nanorod array heterostructure
Source: Royal Society of Chemistry journal article supplement (doi:10.1039/c6tc02097f), 2016-01-01
Supplement: c6tc02097f1.pdf [file c6tc02097f1.pdf]

**High-performance self-powered broadband photodetector  
based on CH<sub>3</sub>NH<sub>3</sub>PbI<sub>3</sub> Perovskite/ZnO nanorod arrays  
heterostructure**

Jichao Yu <sup>a,+</sup>, Xu Chen <sup>a,+</sup>, Yi Wang <sup>b,+</sup>, Hai Zhou <sup>a</sup>, Mengni Xue <sup>a</sup>, Yang Xu <sup>a</sup>,  
Zhaosong Li <sup>a</sup>, Cong Ye <sup>a</sup>, Jun Zhang <sup>a</sup>, Peter A. van Aken <sup>b</sup>, Peter D. Lund <sup>a,c</sup>,  
Hao Wang <sup>a,\*</sup>

<sup>a</sup> Hubei Collaborative Innovation Center for Advanced Organic Chemical Materials,  
Faculty of Physics and Electronic Science, Hubei University, Wuhan 430062, China

<sup>b</sup> Stuttgart Center for Electron Microscopy, Max Planck Institute for Solid State  
Research, Heisenbergstr. 1, 70569 Stuttgart, Germany

<sup>c</sup> Department of Applied Physics, Aalto University, FI-00076 Aalto, Espoo, Finland

\*Corresponding author. E-mail address: nanoguy@126.com

<sup>+</sup>These authors contribute equally to this work.

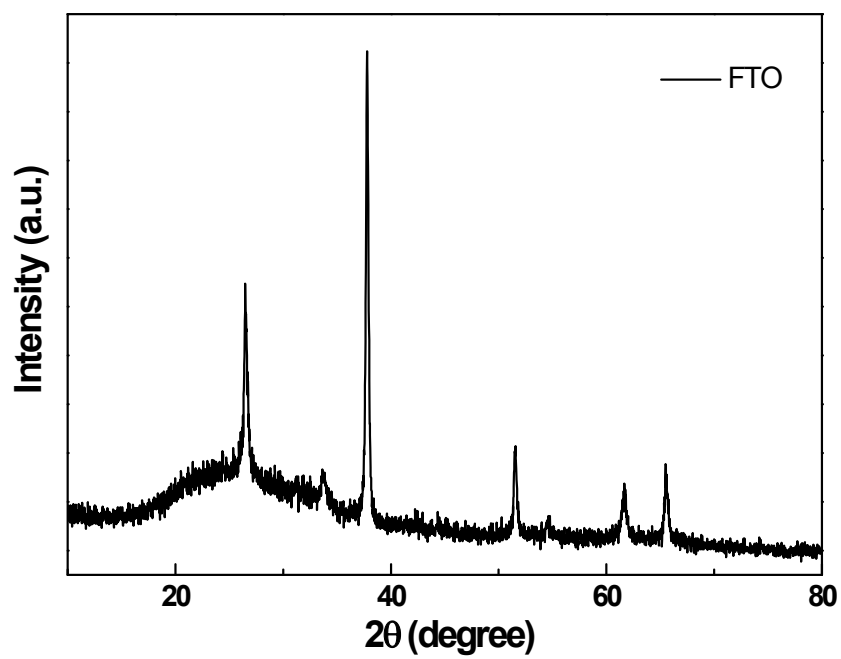

Figure S1 XRD pattern of the pristine FTO substrate.

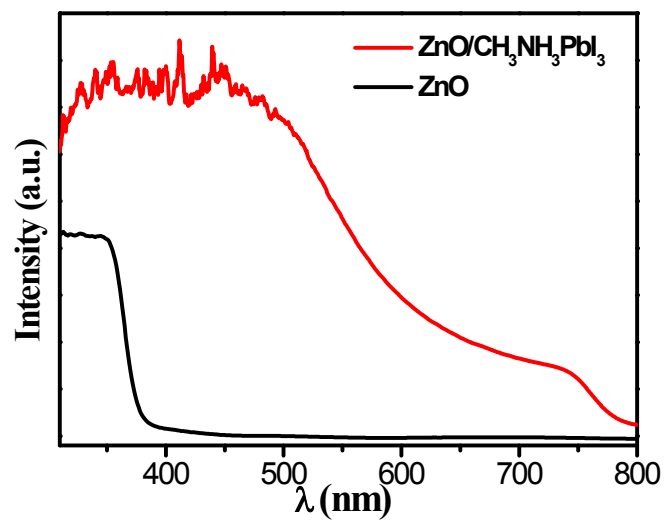

Figure S2 The absorption spectra of ZnO nanorods and CH<sub>3</sub>NH<sub>3</sub>PbI<sub>3</sub> on ZnO nanorods.

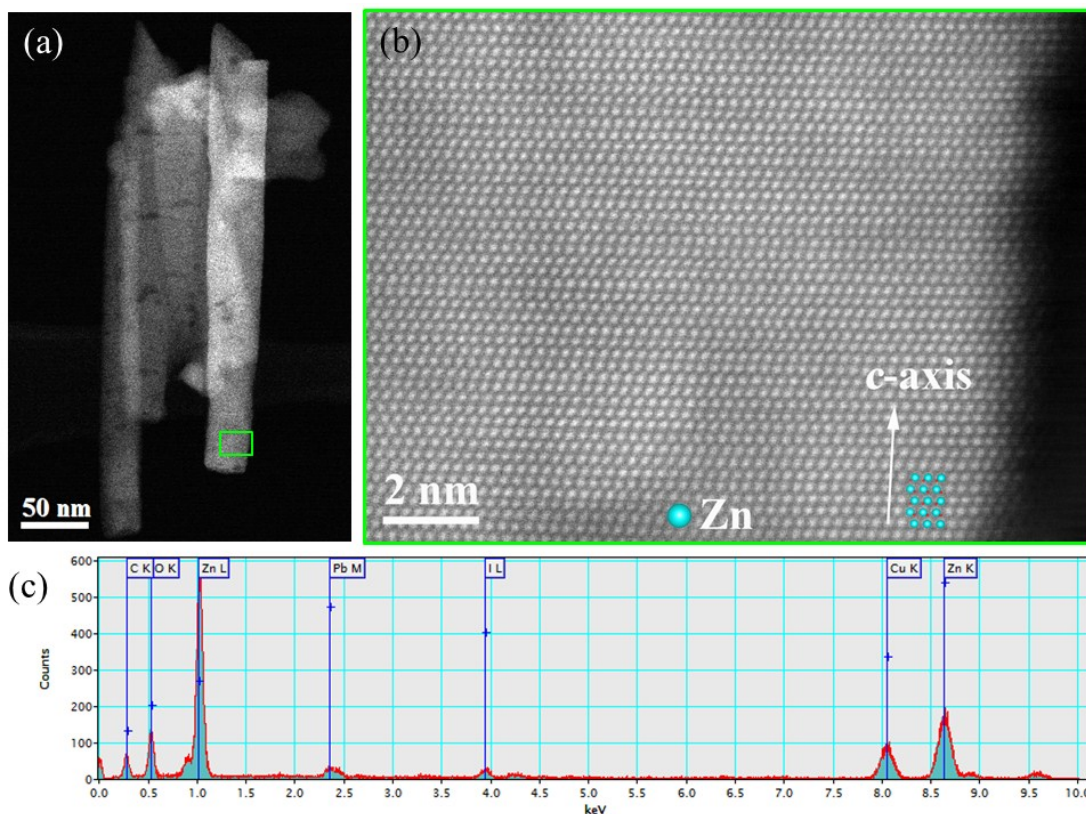

Figure S3 High-angle annular dark-field (HAADF) scanning transmission electron microscopy (STEM) images and EDXS analysis. (a) Low magnification HAADF-STEM image of ZnO-nanorods. (b) Atomic-column resolved HAADF image of a ZnO nanorod of the highlighted area in Fig. S2 (a). An atomic structure model of the hexagonal phase of ZnO along [010] projection is superimposed on the HAADF image. (c) STEM-EDXS spectrum of ZnO nanorods in Fig.S2 (a), in which Pb-M and I-L lines are clearly visible.

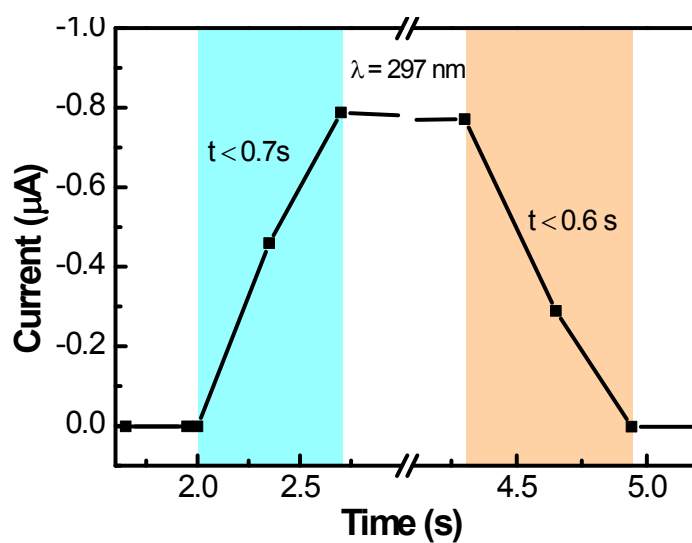

Figure S4 Photocurrent rise and decay of the device measured at a bias of 0 V.

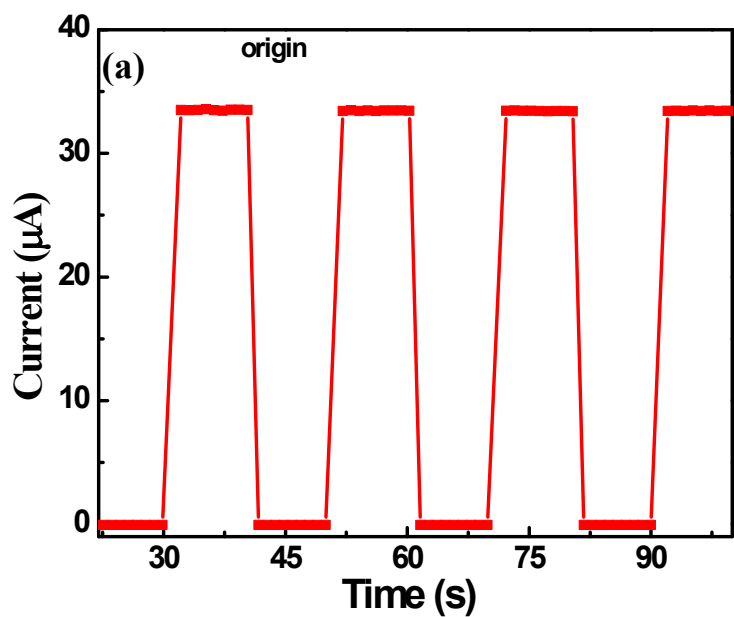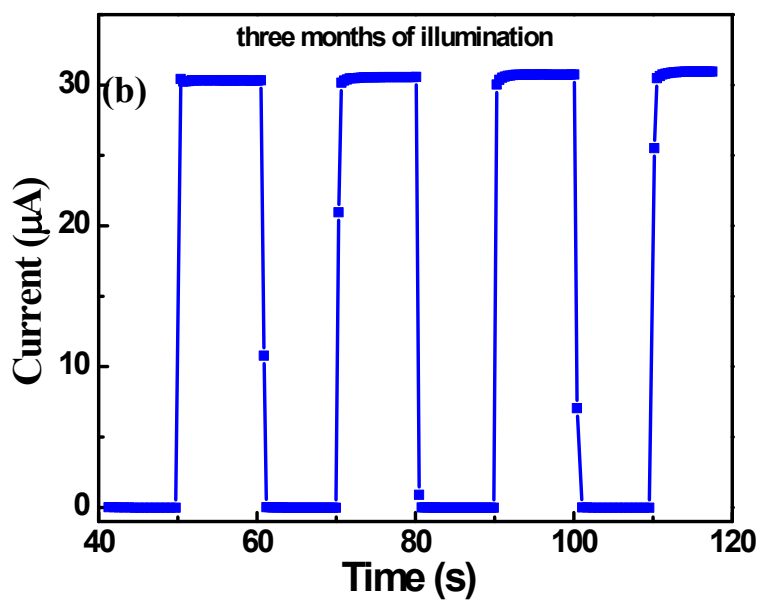

Figure S5 Photoelectric response curves of the original value (a) and after three months of illumination (b).
